## Index to Volume V.

### ARTICLES

|                                                                                                                                              | Page |
|----------------------------------------------------------------------------------------------------------------------------------------------|------|
| BOROWIK, JOSEPH. On what does the Catch of undersized Fish depend? First Report on the Polish Research on Saving Trawls.....                 | 197  |
| BÜCKMANN, A. Die Alterszusammensetzung des Schollenbestandes der süd-östlichen Nordsee im Jahre 1929 .....                                   | 33   |
| CARRUTHERS, J. N. The Water Movements in the Straits of Dover. Exceptional Currents in Winter 1929—30.....                                   | 167  |
| DANNEVIG, ALF. The Death of Fish in very cold Winters.....                                                                                   | 194  |
| DODGSON, R. W. The Problem of Polluted Shellfish, and its Solution .....                                                                     | 149  |
| DOODSON, A. T. Current observations at Horn's Rev, Varne and Smith's Knoll in the years 1922 and 1923.....                                   | 22   |
| EVERDINGEN, E. VAN. The Snellius Expedition.....                                                                                             | 320  |
| HAVINGA, B. Der Granat ( <i>Crangon vulgaris</i> Fabr.) in den holländischen Gewässern .....                                                 | 57   |
| KREPS, E., and N. VERJBINSKAYA. Seasonal Changes in the Phosphate and Nitrate Content and in Hydrogen Ion Concentration in the Barents Sea . | 327  |
| LEES, H. Paper and Glass Collectors for Oyster Spat.....                                                                                     | 383  |
| LISSNER, H. Ein verbesserter Becher für das Standard Netz .....                                                                              | 192  |
| LUNDE, GULBRAND, JENS BÖE and KARL CLOSS. Iodine Content of American Marine Animals.....                                                     | 216  |
| MOHR, ERNA W. Bibliographie der Alters- und Wachstums-Bestimmung bei Fischen. Nachträge und Fortsetzung.....                                 | 88   |
| RUUD, JOHAN T. Nitrates and Phosphates in the Southern Sea .....                                                                             | 347  |
| SCHULZ, BRUNO. Die Hydrographie des Barentsmeeres .....                                                                                      | 291  |
| WEBB, H. MARSCHALL. An Apparatus for Recording the Valve Movements and the Extrusion of Dejecta of Oysters.....                              | 361  |
| WÜST, GEORG. Meridionale Schichtung und Tiefenzirkulation in den Westhälften der drei Ozeane .....                                           | 7    |

### REVIEWS

|                                                                                                                                                                                                                         |     |
|-------------------------------------------------------------------------------------------------------------------------------------------------------------------------------------------------------------------------|-----|
| ALTNÖDER, K. Untersuchungen an den Heringen der westlichen Ostsee und Bericht über die Untersuchungsfahrt zur Feststellung des Vorkommens von Herbstheringslarven in der Laichperiode 1927. Reviewed by K. A. ANDERSSON | 248 |
| ATKINS, W. R. G., and H. H. POOLE. The Photo-chemical and Photo-electric Measurements of Submarine Illumination. Reviewed by MARTIN KNUDSEN                                                                             | 399 |
| BLEGVAD, H. Mortality among animals of the Littoral Region in Ice-Winters. Reviewed by ALF DANNEVIG.....                                                                                                                | 430 |
| BRANDES, H. Über die Verwendung des Wolfschen Ablaufkolorimeters für die Bestimmung der Wasserstoffionenkonzentration des Wassers bei Anwendung von Phenolphthalein. Reviewed by H. WATTENBERG.....                     | 400 |

|                                                                                                                                                                                                                                              | Page |
|----------------------------------------------------------------------------------------------------------------------------------------------------------------------------------------------------------------------------------------------|------|
| BUCH, KURT. Die <i>pH</i> -Bestimmung des Meerwassers. Studien über Eigenschaften und Gebrauch einiger hierfür geeigneten Farbenindikatoren. Reviewed by A. P. ORR .....                                                                     | 401  |
| BÜCKMANN, A. Die Methodik fischereibiologischer Untersuchungen an Meeresfischen. Reviewed by J. J. TESCH .....                                                                                                                               | 249  |
| BULL, H. O. Studies on Conditioned Responses in Fishes. Part II. Reviewed by J. A. BIERENS DE HAAN .....                                                                                                                                     | 432  |
| CARRUTHERS, J. N. The Water Movements in the Southern North Sea. Part III. The Area off the Wash. (a) The Flow of Water past the Inner Dowsing Light-vessel. Reviewed by B. SCHULZ .....                                                     | 392  |
| DANNEVIG, ALF. The propagation of our common fishes during the cold winter 1924. Investigations on the Norwegian Skagerrack coast. Reviewed by W. SCHNAKENBECK .....                                                                         | 407  |
| DAVIS, H. S., Care and Diseases of Trout. Reviewed by ISOBEL BLAKE (I. J. F. WILLIAMSON) .....                                                                                                                                               | 424  |
| DEMEL, K. Température des eaux côtières polonaises de la Baltique en 1926—28. Reviewed by M. SIEDLECKI .....                                                                                                                                 | 242  |
| DEMEL, K. Sur la distinction des races des harengs pêches près de la côte polonaise. Reviewed by M. SIEDLECKI .....                                                                                                                          | 252  |
| DODGSON, R. W. The Production of Clean Shellfish. Essay-Review by J. H. ORTON .....                                                                                                                                                          | 385  |
| EHRENBAUM, E. Der Flusssaal, <i>Anguilla vulgaris</i> Turt. Reviewed by P. JESPERSEN .....                                                                                                                                                   | 423  |
| EKMAN, V. WALFRID. Über die Strommenge der Konvektionströme im Meere. Reviewed by A. DEFANT .....                                                                                                                                            | 393  |
| EWEN, GEORGE F. MC. A Mathematical Theory of the vertical Distribution of Temperature and Salinity in Water under the Action of Radiation, Conduction, Evaporation, and Mixing due to the Resulting Convection. Reviewed by H. THORADE ..... | 398  |
| EWEN, G. F. MC. Methods of Estimating the Significance of Differences in or Probabilities of Fluctuations due to Random Sampling. Reviewed by H. J. BUCHANAN-WOLLASTON .....                                                                 | 434  |
| FJELSTAD, J. E. Ein Beitrag zur Theorie der winderzeugten Meeresströmungen. Reviewed by V. W. EKMAN .....                                                                                                                                    | 396  |
| FORD, E. Herring Investigations at Plymouth. V—VII. Reviewed by W. C. HODGSON .....                                                                                                                                                          | 110  |
| FRIDRIKSSON, ARNI. Age-Composition of the Stock of Cod in East Icelandic Fjords during the years 1925—1927. Reviewed by MICHAEL GRAHAM .....                                                                                                 | 112  |
| GALL, JEAN LE. Remarques et statistiques biologiques sur les Harengs de la Mer du Nord, de la Manche et de l'Atlantique. Reviewed by E. EMRYS WATKIN .....                                                                                   | 411  |
| GRACE, S. F. Internal Friction in Certain Tidal Currents. Reviewed by V. WALFRID EKMAN .....                                                                                                                                                 | 396  |
| GRAHAM, MICHAEL. Studies of Age-Determination in Fish. Part I: A Study of the Growth-Rate of Codling ( <i>Gadus callarias</i> L.) on the Inner Herring Trawling Ground. Reviewed by HAROLD THOMPSON .....                                    | 115  |
| GRAHAM, MICHAEL. Studies of Age-Determination in Fish. Part II: A Survey of the Literature. Reviewed by HAROLD THOMPSON .....                                                                                                                | 117  |
| GRAHAM, MICHAEL. On Methods of Marking Round Fish with an Account of Tests in Aquaria. Reviewed by OSCAR SUND .....                                                                                                                          | 121  |

|                                                                                                                                                                                                                                                                       | Page |
|-----------------------------------------------------------------------------------------------------------------------------------------------------------------------------------------------------------------------------------------------------------------------|------|
| GREGORY, J. W. The Geological History of the Atlantic Ocean — being the Presidential Address to the Geological Society of London at its Anniversary Meeting on 15th February, 1929. Reviewed by J. N. CARRUTHERS.....                                                 | 103  |
| HAVINGA, B. Krebse und Weichtiere. Handbuch der Seefischerei Nordeuropas. Reviewed by C. M. YONGE.....                                                                                                                                                                | 271  |
| HELLAND-HANSEN, BJÖRN. Nybygningen for Det Geophysiske Institut. Reviewed by D'ARCY W. THOMPSON.....                                                                                                                                                                  | 229  |
| HENKING, H. Die Ostseefischerei. Handbuch der Seefischerei Nordeuropas. Reviewed by M. SIEDLECKI.....                                                                                                                                                                 | 264  |
| HENKING, H. Untersuchungen an Salmoniden mit besonderer Berücksichtigung der Art- und Rassenfragen. Teil I. Reviewed by R. Southern.....                                                                                                                              | 426  |
| HERRINGTON, W. C. The Pismo Clam. Further Studies of its Life History and Depletion. Reviewed by F. S. WRIGHT.....                                                                                                                                                    | 428  |
| HESSELBERG, TH. Ein neuer Ausdruck für den Austauschkoefizienten. Reviewed by J. P. JACOBSEN.....                                                                                                                                                                     | 231  |
| HICKLING, C. F. A contribution towards the life-history of the Spur-dog. Reviewed by E. EHRENBaum.....                                                                                                                                                                | 423  |
| HINARD, G., et L. LAMBERT. Tableau de l'Ostréiculture Française. Reviewed by H. P. SHERWOOD.....                                                                                                                                                                      | 123  |
| HINARD, G. Rapport sur le Contrôle Sanitaire des Etablissements Coquillers. Reviewed by H. M. WEBB.....                                                                                                                                                               | 124  |
| JACOBSEN, J. P. Eine graphische Methode zur Bestimmung des Vermischungs-koeffizienten im Meere. Reviewed by JOHN B. TAIT.....                                                                                                                                         | 233  |
| JACOBSEN, J. P. Contribution to the Hydrography of the North Atlantic. The "Dana"-Expedition 1921—22. The Danish "Dana"-Expedition 1920—22 in the North Atlantic and the Gulf of Panama. Reviewed by BRUNO SCHULZ                                                     | 235  |
| JENSEN, AAGE J. C. An Investigation of the Stock of Plaice in the Southern Horns Reef Area in the Years 1925 and 1927. Reviewed by A. BÜCKMANN                                                                                                                        | 408  |
| JENSEN, AAGE J. C. On the influence of the size of the stock of cod upon the yield of the herring fishery in the Kattegat, Belt Sea and western part of the Baltic, and some other causes of variations in the cod and herring fisheries. Reviewed by H. LISSNER..... | 410  |
| JESPERSEN, P. Investigations on the Food of the Herring in Danish Waters. Reviewed by R. E. SAVAGE.....                                                                                                                                                               | 252  |
| JOHANSEN, A. C. Mortality among Porpoises, Fish and the larger Crustaceans in the waters around Denmark in Severe Winters. Reviewed by ALF DANNEVIG                                                                                                                   | 432  |
| JOUBIN, L. (Edited by). Faune Ichthyologique de l'Atlantique Nord. No. 1. Reviewed by J. R. NORMAN.....                                                                                                                                                               | 122  |
| Joubin, L. (Edited by). Faune Ichthyologique de l'Atlantique Nord. Nos. 2 & 3. Reviewed by J. R. NORMAN.....                                                                                                                                                          | 260  |
| KÄNDLER, R. Untersuchungen über die Biologie der Auster. No. 3. Verbreitung und Wachstum der Austernbrut im Wattenmeer. Reviewed by H. P. SHERWOOD.....                                                                                                               | 267  |
| KYLE, H. M. Die Statistik der Seefischerei Nordeuropas. Reviewed by D'ARCY WENTWORTH THOMPSON.....                                                                                                                                                                    | 419  |
| LEBOUR, MARIE V. The Planktonic Diatoms of Northern Seas. Reviewed by C. H. OSTENFELD.....                                                                                                                                                                            | 404  |
| LEWIS, RALPH C. The Food Habits of the California Sardine in Relation to the Seasonal Distribution of Microplankton. Reviewed by MARIE V. LEBOUR..                                                                                                                    | 244  |

|                                                                                                                                                                                                                                                | Page |
|------------------------------------------------------------------------------------------------------------------------------------------------------------------------------------------------------------------------------------------------|------|
| LUMLEY, A., J. J. PIQUÉ, and G. A. REAY. The Handling and Stowage of White Fish at Sea. Reviewed by CRAWFORD HERON .....                                                                                                                       | 421  |
| MARTENS, ERIK. Hydrographical Investigations during the "Michael Sars"-Expedition 1924. Reviewed by G. BÖHNECKE .....                                                                                                                          | 236  |
| MARTENS, ERIK. Hydrographical Investigations in the Norwegian Sea off Møre 1925—1928. Reviewed by G. BÖHNECKE .....                                                                                                                            | 238  |
| MÖLLER, LOTTE. Die Zirkulation des Indischen Ozeans auf Grund von Temperatur- und Salzgehaltstiefenmessungen und Oberflächenstrombeobachtungen. Reviewed by DONALD J. MATTHEWS .....                                                           | 102  |
| MOTTLEY, C. McC. Pacific Salmon Migration. Report on the Study of the Scale of the Spring Salmon <i>Oncorhynchus tshawytscha</i> , tagged in 1926 and 1927 off the West Coast of Vancouver Island. Reviewed by W. J. M. MENZIES .....          | 261  |
| NEEDLER, A. W. H. Studies on the Life History of the Haddock ( <i>Melanogrammus aeglefinus</i> Linnaeus). Reviewed by HAROLD THOMPSON .....                                                                                                    | 113  |
| NIENBURG, W. Die feststehenden Pflanzen der nordeuropäischen Meere. Reviewed by E. J. SALISBURY .....                                                                                                                                          | 430  |
| ORTON, J. H. Experiments in the Sea on the Growth-inhibitive and Preservative Value of Poisonous Paints and other substances. Reviewed by G. BARGER ..                                                                                         | 433  |
| PERCIVAL, E. A Report on the Fauna of the Estuaries of the River Tamar and the River Lynher. Reviewed by H. C. REDEKE .....                                                                                                                    | 245  |
| PRATJE, OTTO. Subfossile Seichtwassermuscheln auf der Doggerbank und in der südlichen Nordsee? Reviewed by RICHARD ELMHIRST .....                                                                                                              | 107  |
| PRYTHERCH, HERBERT F. Investigation of the Physical Conditions Controlling Spawning of Oysters and the Occurrence, Distribution and Setting of Oyster Larvae in Milford Harbor, Connecticut. Reviewed by H. P. SHERWOOD ..                     | 267  |
| REITH, J. F. Der Jodgehalt von Meerwasser. Reviewed by KARL CLOSS .....                                                                                                                                                                        | 402  |
| REY, LUIS LOZANO. Fauna Ibérica — Peces. Reviewed by A. RAMALHO .....                                                                                                                                                                          | 262  |
| ROBSON, G. C. On the Dispersal of the American Slipper Limpet in English Waters (1915—29). Reviewed by F. S. WRIGHT .....                                                                                                                      | 429  |
| ROLLEFSEN, GUNNAR. Torske-egg med deformerte fostre. Reviewed by ALF DANNEVIG .....                                                                                                                                                            | 255  |
| RUSSELL, F. S., and C. M. YONGE. The Seas. Our Knowledge of Life in the Seas and how it is gained. Reviewed by MICHAEL GRAHAM .....                                                                                                            | 242  |
| RUUD, JOHAN T. On the Biology of Copepods off Møre 1925—1927. Reviewed by G. P. FARRAN .....                                                                                                                                                   | 105  |
| SAEMUNDSSON, BJARNI. On the Age and Growth of the Coalfish ( <i>Gadus virens</i> L.), the Norway Pout ( <i>Gadus esmarki</i> Nilsson) and the Poutassou ( <i>Gadus poutassou</i> Risso) in Icelandic Waters. Reviewed by HAROLD THOMPSON ..... | 412  |
| SCHNAKENBECK, W. Beitrag zur Kenntnis der Entwicklung einiger Meeresfische I. Reviewed by R. S. CLARK .....                                                                                                                                    | 256  |
| SCHULZ, B., and A. WULFF. Hydrographie und Oberflächenplankton des westlichen Barentsmeeres im Sommer 1927. Reviewed by MARIE V. LEBOUR and H. W. HARVEY .....                                                                                 | 243  |
| SCOTLAND, FISHERY BOARD FOR. Crab Marking Experiments. Reviewed by ALEXANDER MEEK .....                                                                                                                                                        | 270  |
| SCOTT, ANDREW. The Copepod Parasites of Irish Sea Fishes. Reviewed by G. P. FARRAN .....                                                                                                                                                       | 106  |
| SMITH, W. C. A Study of the Manx Herring Shoals during the Period 1923—1928. Reviewed by E. FORD .....                                                                                                                                         | 406  |

|                                                                                                                                                                                                            | Page |
|------------------------------------------------------------------------------------------------------------------------------------------------------------------------------------------------------------|------|
| SPÄRCK, R. Preliminary Survey of the Results of Quantitative Bottom Investigations in Iceland and Faroe Waters. 1926—1927. Reviewed by E. FORD . . . .                                                     | 414  |
| STEPHEN, A. C. Notes on the Rate of Growth of <i>Tellina tenuis</i> da Costa in the Firth of Clyde. Reviewed by H. BLEGVAD . . . . .                                                                       | 247  |
| STORROW, B., and D. COWAN. Herring Investigations. 1. Herring Shoals, by B. STORROW. 2. Size, by DOROTHY COWAN. (1928—1929). Reviewed by G. P. FARRAN . . . . .                                            | 258  |
| STUPART, Sir F., J. PATTERSON, and H. G. SMITH. Ocean Surface-Water Temperatures — Methods of Measuring and Preliminary Results. Reviewed by J. R. LUMBY . . . . .                                         | 239  |
| TÅNING, Å. VEDEL. Plaice Investigations in Icelandic Waters. Reviewed by D. E. THURSBY-PELHAM . . . . .                                                                                                    | 108  |
| THOMPSON, H. General Features in the Biology of the Haddock ( <i>Gadus aeglefinus</i> L.) in Icelandic Waters in the Period 1903—1926. Reviewed by A. FRIDRIKSSON . . . . .                                | 415  |
| THOMPSON, HAROLD. Haddock Biology (North Sea). A brief Survey of recent Data, Methods and Results. Reviewed by OSCAR SUND . . . . .                                                                        | 417  |
| THOMPSON, THOMAS G., ROBERT C. MILLER, GEORGE H. HITCHINGS and SELDON P. TODD. Studies of the Sea Water near the Puget Sound Biological Station during the Summer of 1927. Reviewed by KURT BUCH . . . . . | 403  |
| THORADE, H. Gezeitenuntersuchungen in der Deutschen Bucht der Nordsee. Nach den Beobachtungen des Vermessungsschiffes "Panther" im Juni 1924. Reviewed by S. E. STENIJ . . . . .                           | 240  |
| WILLIMZIK, MAGDALENE. Die Strömungen im subtropischen Konvergenzgebiet des Indischen Ozeans. Reviewed by DONALD J. MATTHEWS . . . . .                                                                      | 101  |
| WOŁOSZYNSKA, J. Dinoflagellatae from the Polish coast of the Baltic and from the swamps near the mouth of the river Piasnica. Reviewed by M. SIEDLECKI . . . . .                                           | 245  |

#### NOTES AND CORRESPONDENCE

##### Obituary Notices:—

|                                                              |     |
|--------------------------------------------------------------|-----|
| FULTON, THOMAS WEMYSS (1855—1929) by J. T. JENKINS . . . . . | 3   |
| NANSEN, FRIDTJOF (1861—1930) by D'ARCY W. THOMPSON . . . . . | 141 |
| EKMAN, GUSTAF (1852—1930) by OTTO PETTERSSON . . . . .       | 287 |

##### Correspondence:—

|                                                                                                                                           |     |
|-------------------------------------------------------------------------------------------------------------------------------------------|-----|
| The Woods Hole Oceanographic Institution; the Editor . . . . .                                                                            | 226 |
| Institute of Fishery Industries and Scientific Exploration, of the Lenin Academy of Agricultural Sciences, U.S.S.R.; the Editor . . . . . | 228 |
| Dr. J. N. CARRUTHERS on Drift Bottle Design . . . . .                                                                                     | 437 |

#### BIBLIOGRAPHY

|                                                                                                  |                  |
|--------------------------------------------------------------------------------------------------|------------------|
| Current Bibliography prepared by the Editor with the assistance of Miss THURSBY-PELHAM . . . . . | 127, 272 and 438 |
|--------------------------------------------------------------------------------------------------|------------------|
